# Supplementary material
Source: publisher figshare collection journal article supplement (https://frontiersin.figshare.com/ndownloader/files/26631872)
Supplement: Supplementary file [file 26631872]

**Supplementary Table 6:** *In silico* canSNP typing in intragenic region of *Coxiella burnetii* isolates sequenced in this study.

| Isolate name            | Host   | Country | CanSNP in intragenic conserved region |                 |     |     |     |     |     |     |                 |                 | Derived<br>for<br>CanSNP <sup>b</sup> | SNP type |
|-------------------------|--------|---------|---------------------------------------|-----------------|-----|-----|-----|-----|-----|-----|-----------------|-----------------|---------------------------------------|----------|
|                         |        |         | C.1                                   | C.3             | C.4 | C.5 | C.6 | C.7 | C.8 | C.9 | C.10            | C.11            |                                       |          |
| Nine Mile               | Tick   | US      | C                                     | T               | G   | T   | G   | A   | C   | A   | T               | G               | C10                                   | 3        |
| CbBEC1                  | Cattle | Belgium | C                                     | NA <sup>c</sup> | G   | T   | G   | A   | C   | A   | NA <sup>c</sup> | A               | C11                                   | 1        |
| CbBEB1                  | Cattle | Belgium | C                                     | T               | G   | T   | G   | A   | C   | A   | C               | A               | C11                                   | 2        |
| CbBEB2                  | Goat   | Belgium | C                                     | T               | G   | T   | G   | A   | C   | A   | C               | NA <sup>c</sup> | C11                                   | 2        |
| CbBEC2                  | Goat   | Belgium | C                                     | T               | G   | T   | G   | A   | C   | A   | C               | A               | C11                                   | 2        |
| Henzerling <sup>a</sup> | Human  | Italy   | C                                     | T               | G   | T   | G   | A   | C   | A   | C               | A               | C11                                   | 8        |

<sup>a</sup> Genetic profile from *Karlsson et al.* (2014) for comparison with isolates from this study.

<sup>b</sup> Based on phylogeny from *Karlsson et al.* (2014).

<sup>c</sup> NA: No available result from MLVA typing.
